# Supplementary material for: Targeting pancreatic cancer metabolic dependencies through glutamine antagonism
Source: PubMed Central journal article supplement (PMC10824664; doi:10.1038/s43018-023-00647-3), 2023-10-09

Figure 5g

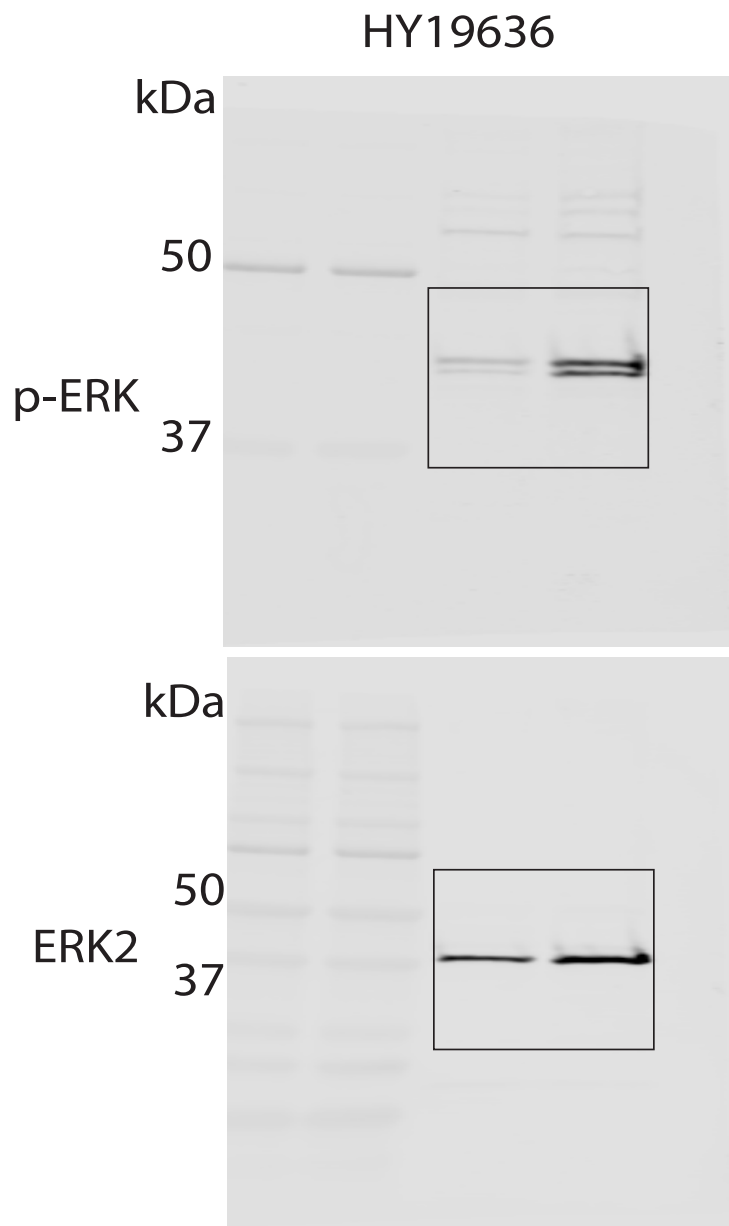

Image obtained through Licor.

p-ERK (CST 4376, 1:1,000)

ERK2 (sc-1647, 1:1,000)

IRDye® 800CW Goat anti-Rabbit IgG Secondary Antibody

IRDye® 680RD Goat anti-Mouse IgG Secondary Antibody

# Figure 5g

PaTu-8988T

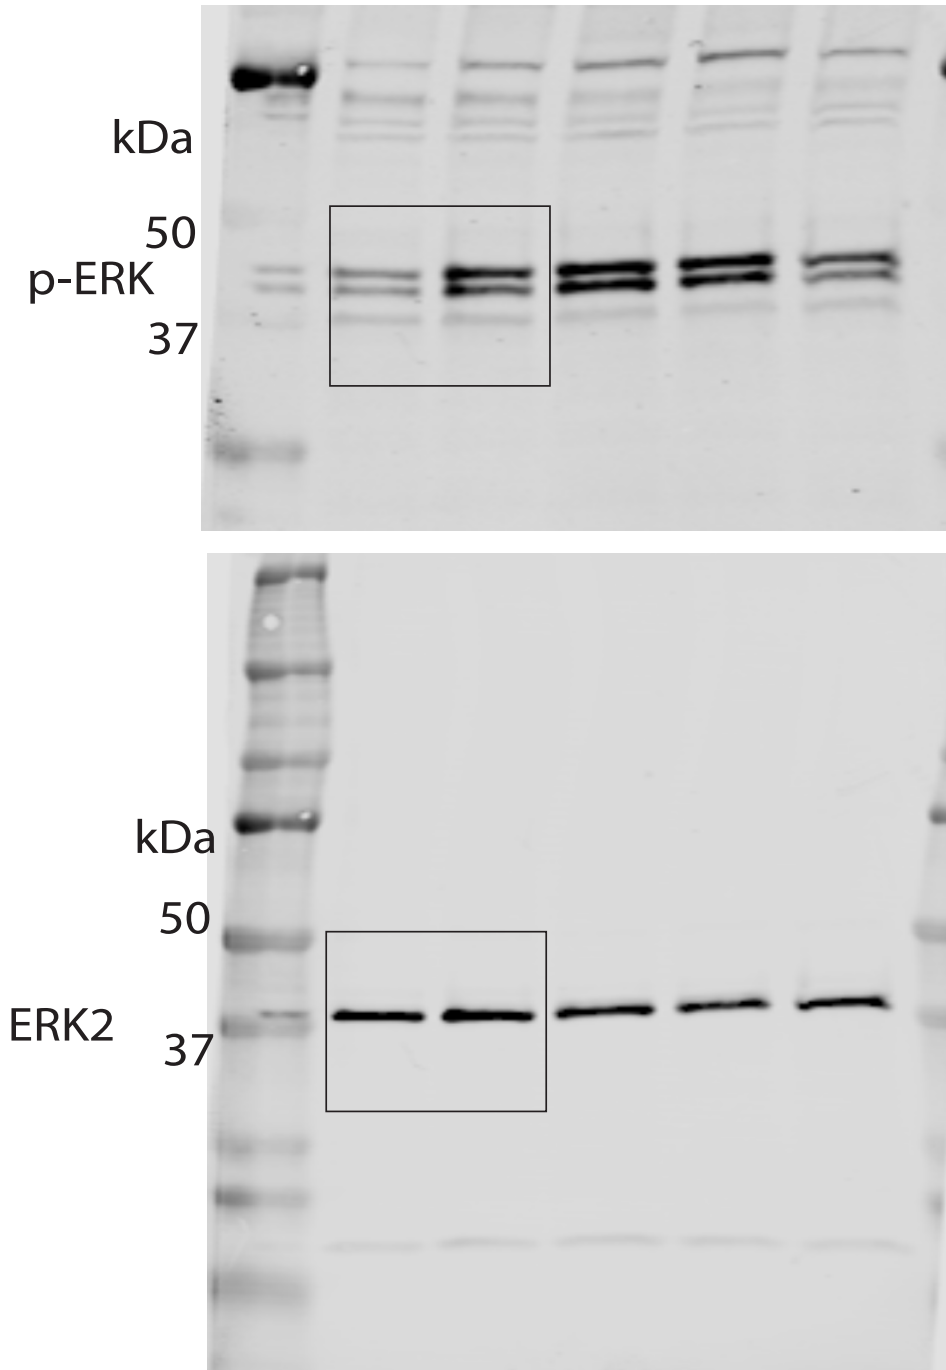

Image obtained through Licor.  
p-ERK (CST 4376, 1:1,000)  
ERK2 (sc-1647, 1:1,000)

IRDye® 800CW Goat anti-Rabbit IgG Secondary Antibody  
IRDye® 680RD Goat anti-Mouse IgG Secondary Antibody

Figure 5g

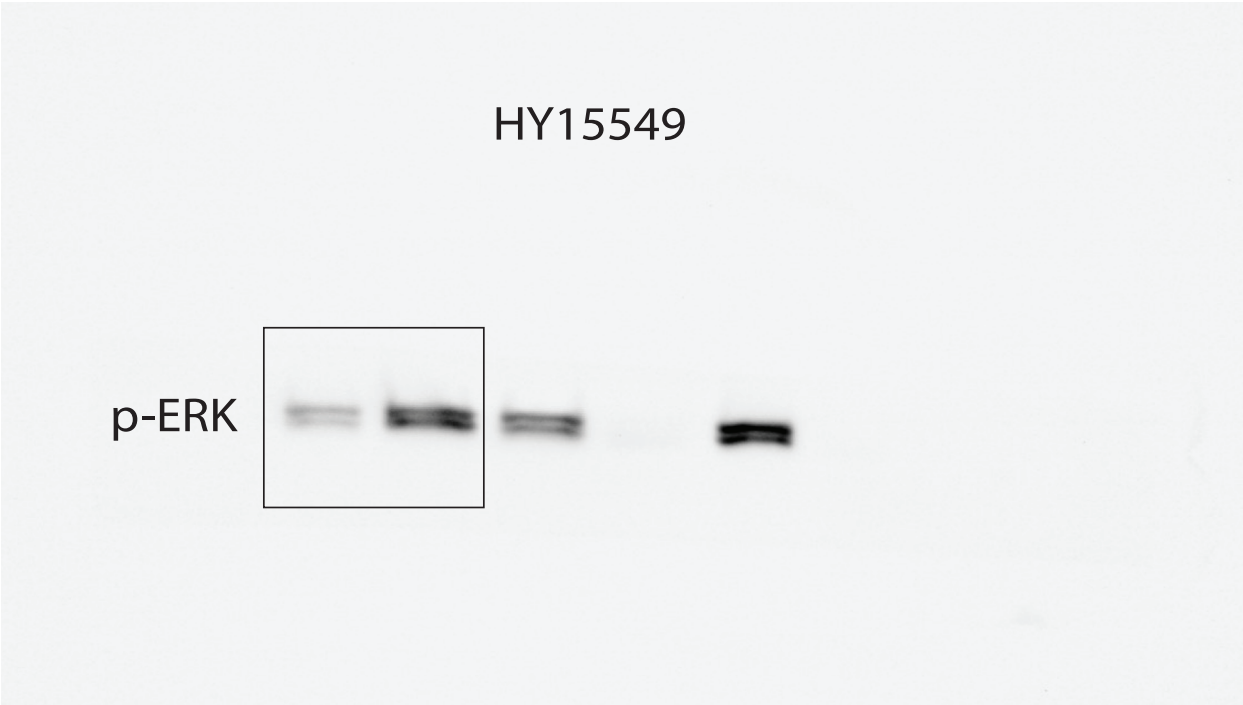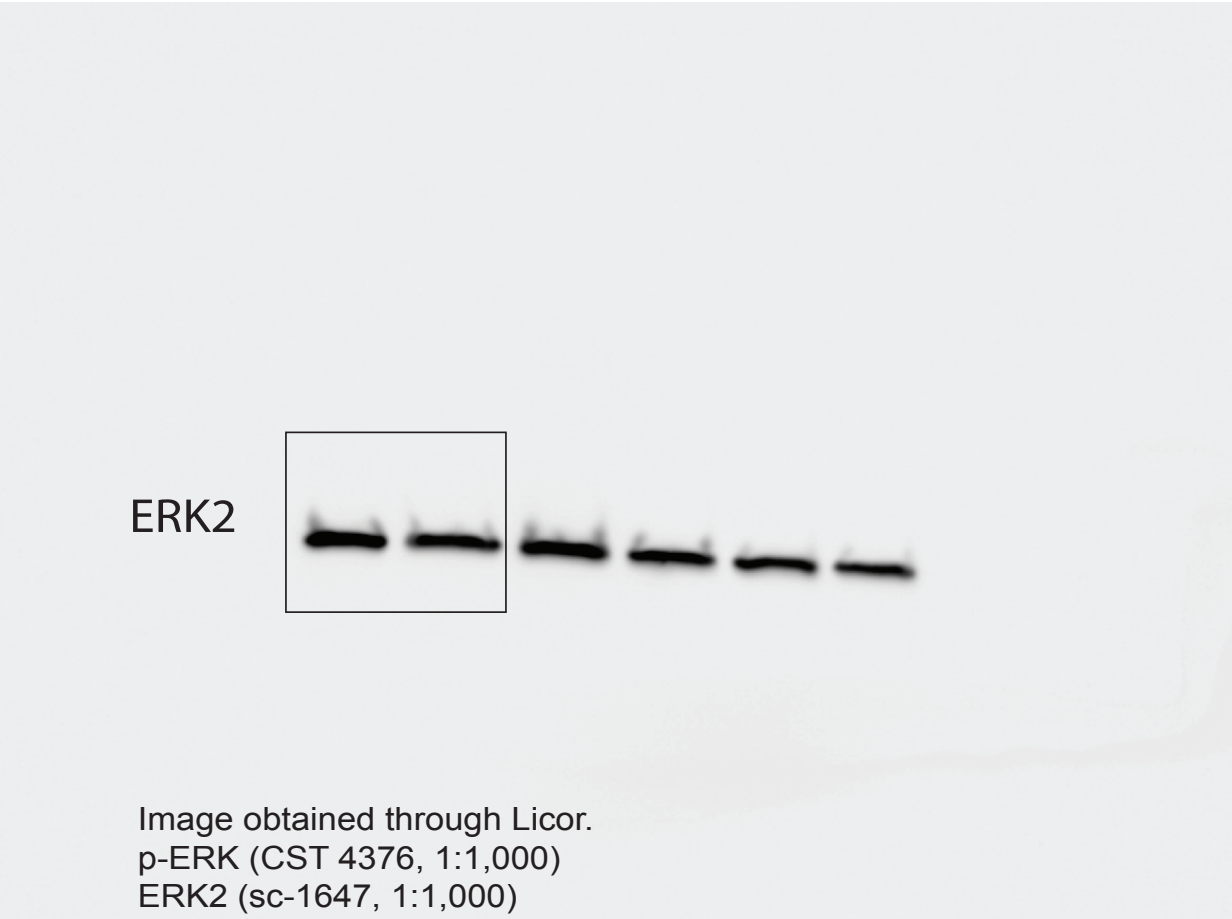

IRDye® 800CW Goat anti-Rabbit IgG Secondary Antibody  
IRDye® 680RD Goat anti-Mouse IgG Secondary Antibody

# Extended Fig 6c

Phospho-eIF2 $\alpha$  (Ser51)  
(CST, 3398, 1:1,000)

p-eIF2 $\alpha$

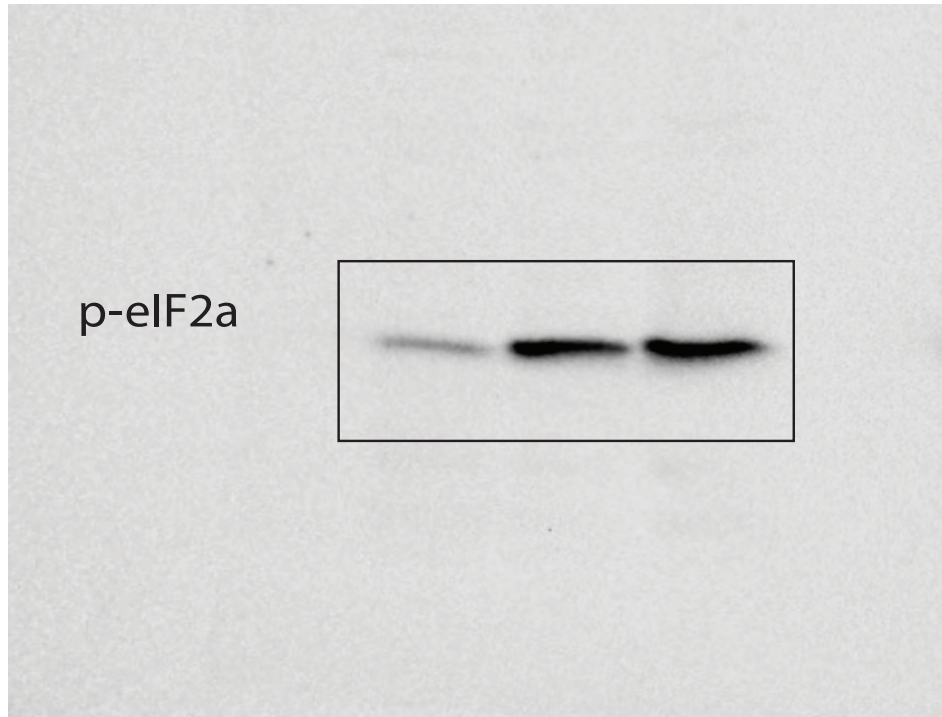

ATF4 (CST, 11815,  
1:1,000)

ATF4

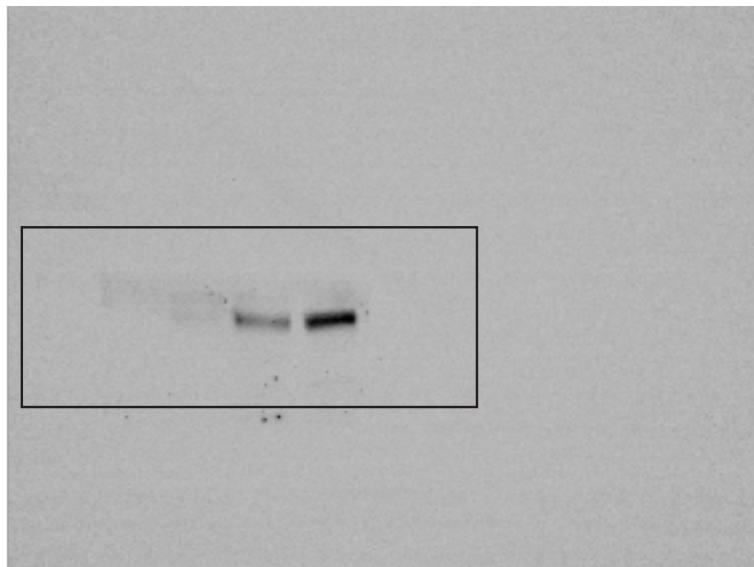

ERK2

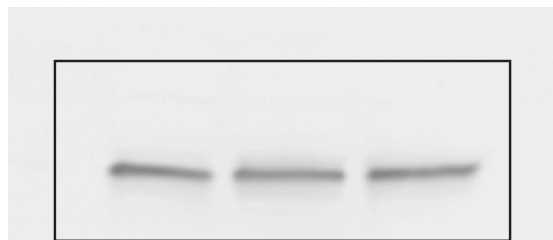

# Extended Fig 6f

\*

Anti-O-Linked  
N-Acetylglucosamine antibody  
[RL2](ab2739)

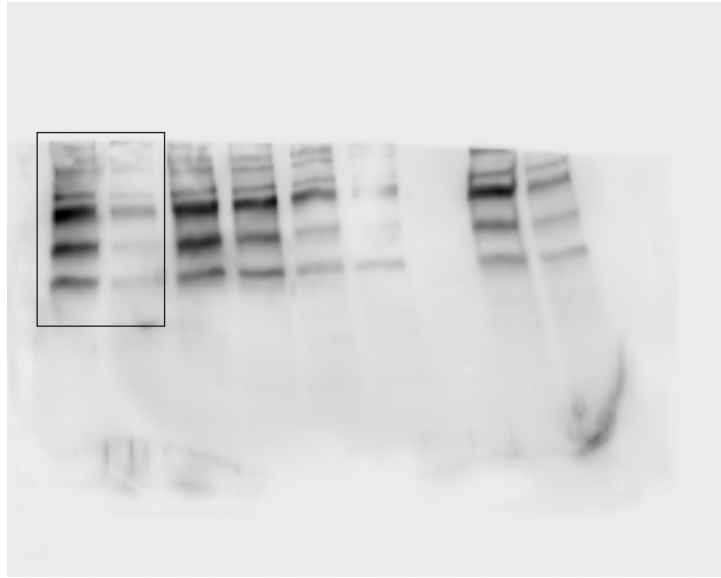

ERK2

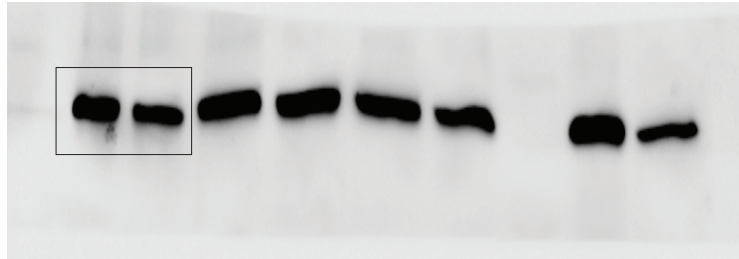

\*

Same membrane as in Extended Figure 10e.  
Gel was probed for p-ERK and ERK2, then reprobbed for  
Anti-O-Linked N-Acetylglucosamine antibody

# Extended Fig 9a

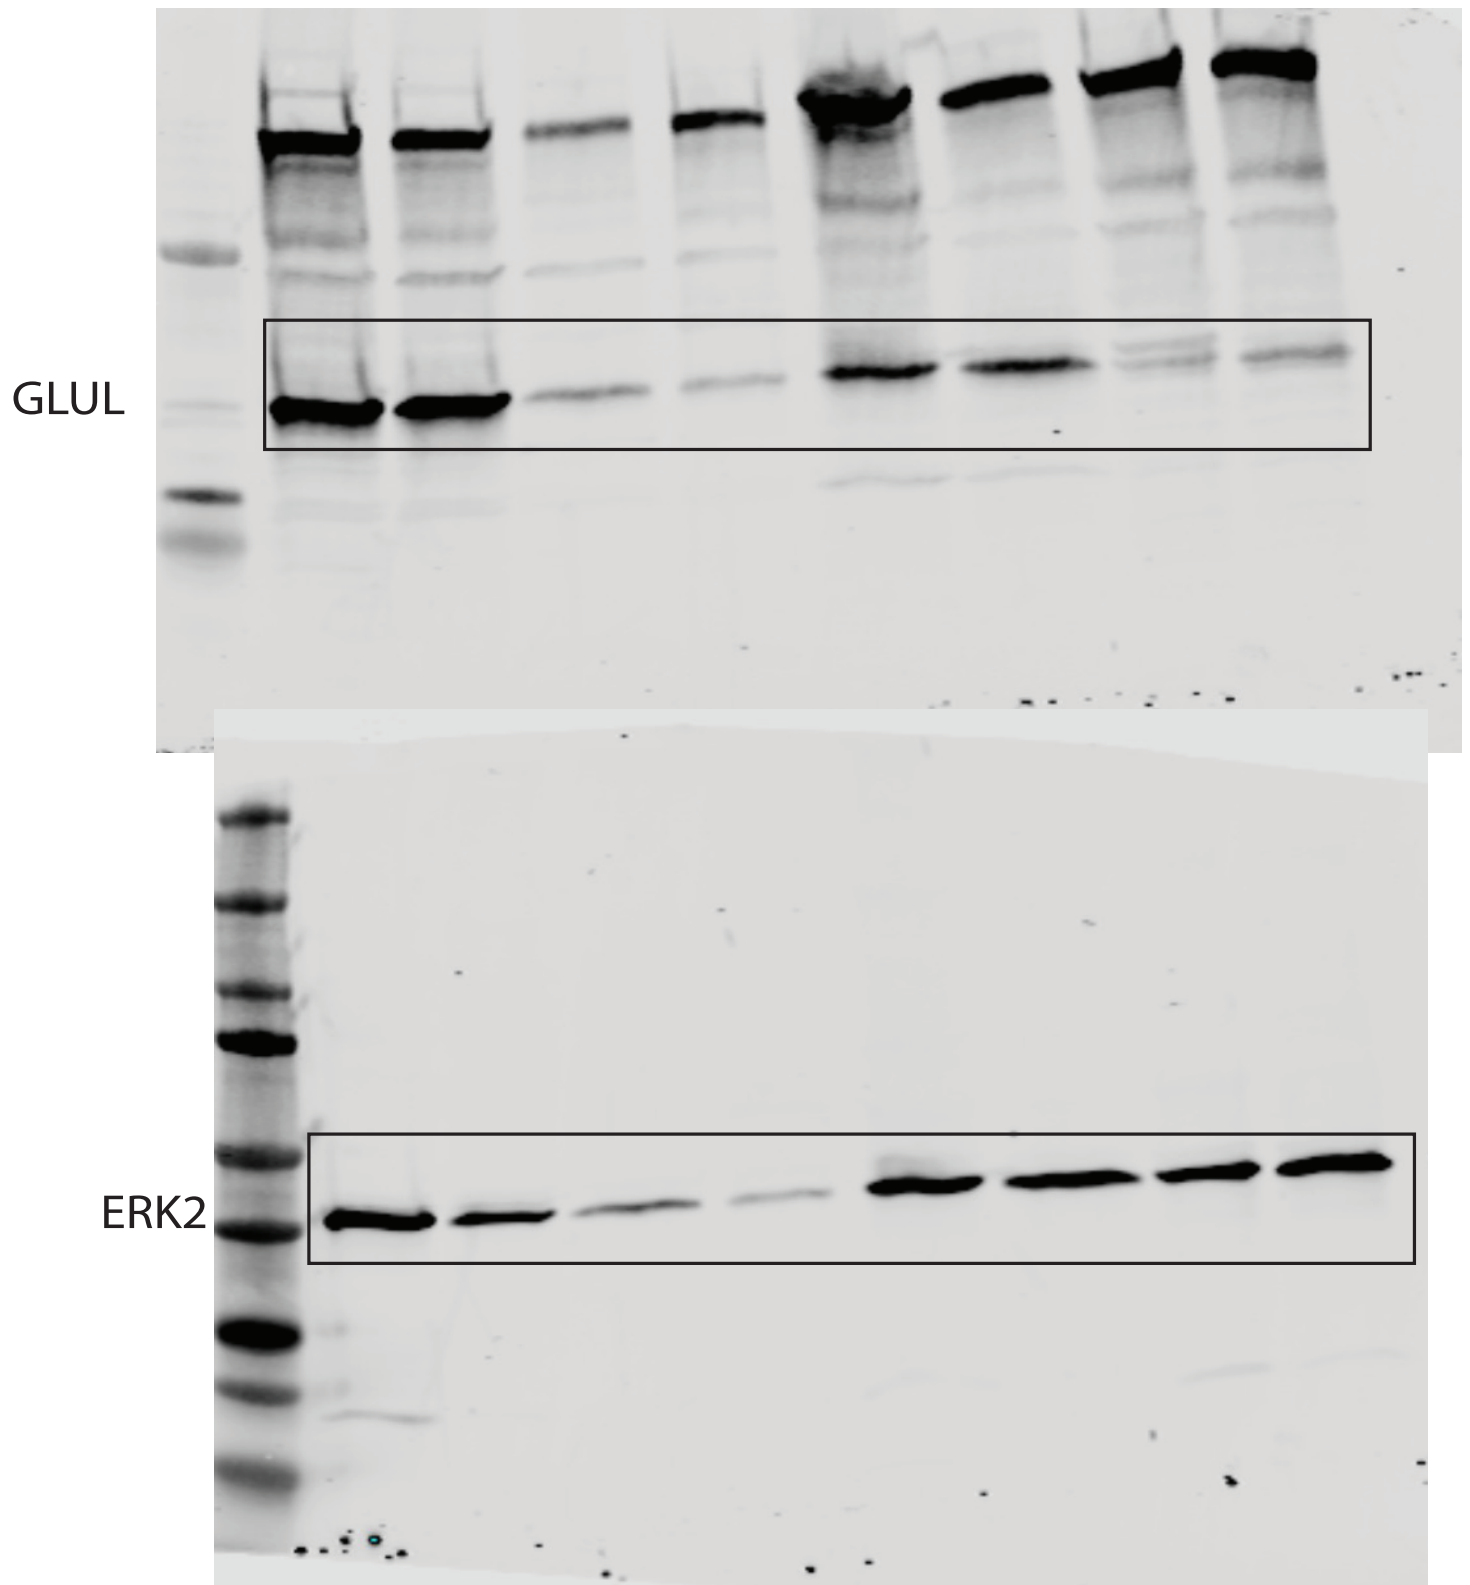

Image obtained through Licor.

GLUL (Abcam, ab228590)

ERK2 (sc-1647, 1:1,000)

IRDye® 800CW Goat anti-Rabbit IgG Secondary Antibody

IRDye® 680RD Goat anti-Mouse IgG Secondary Antibody

# Extended Fig 9b

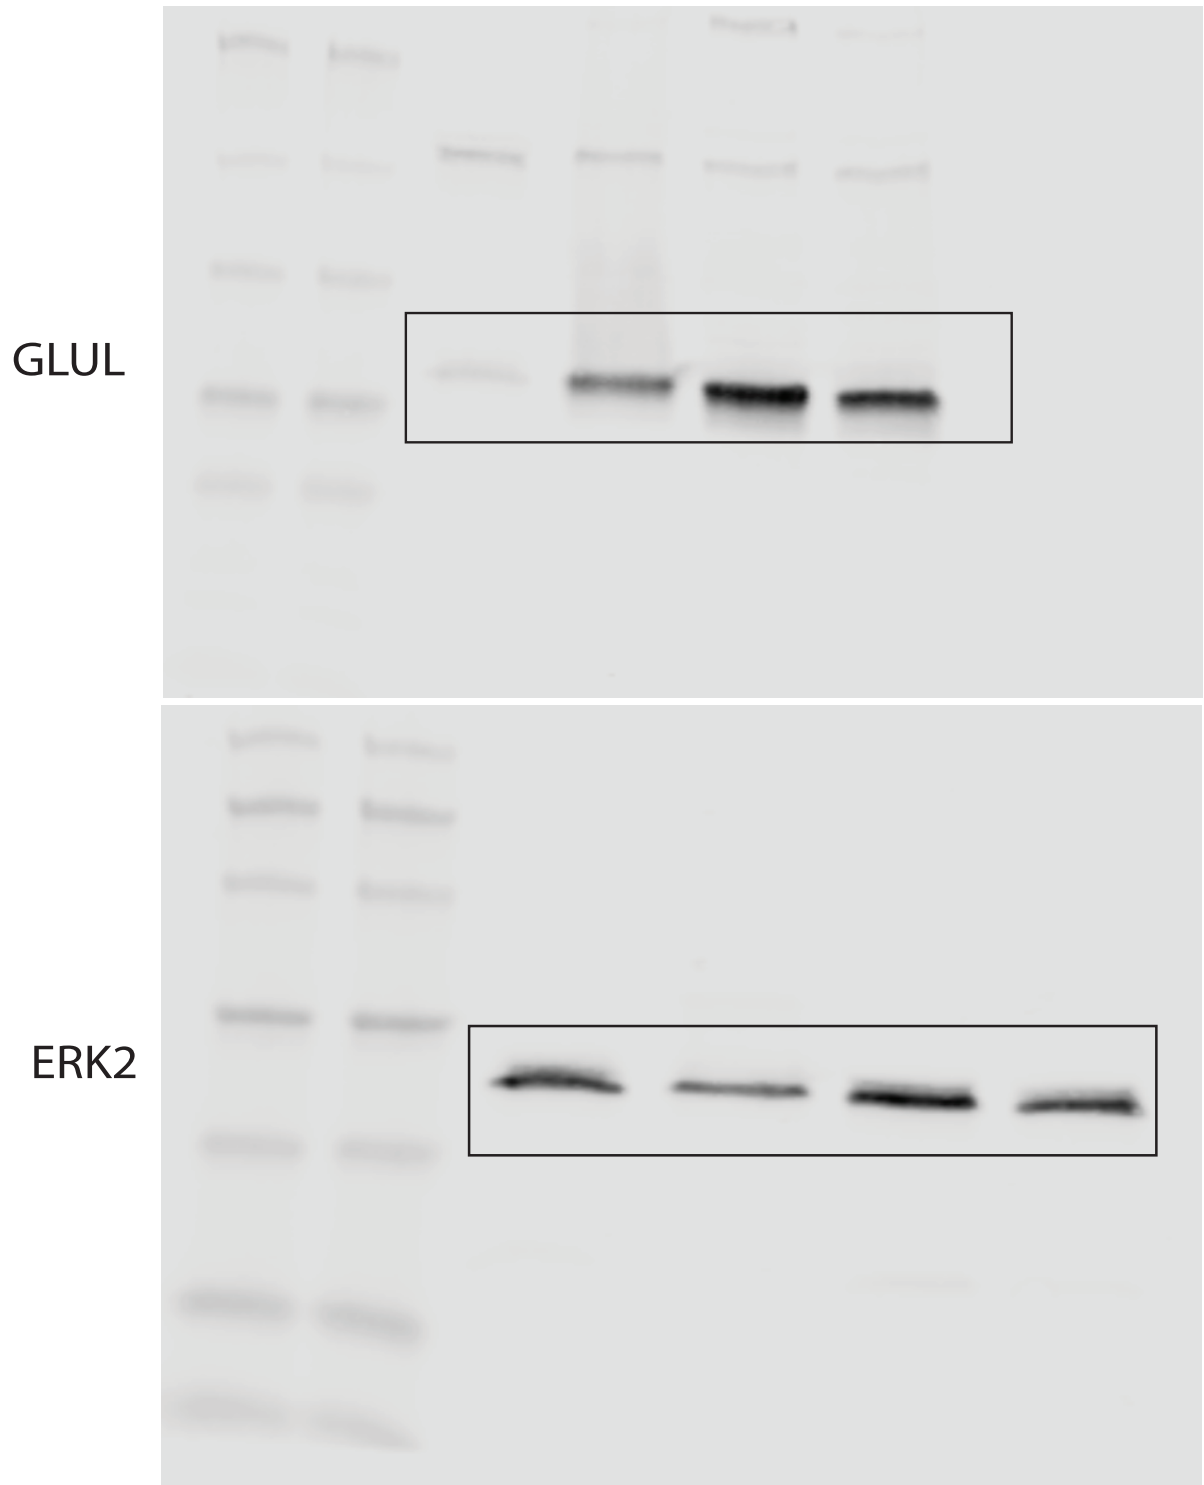

Image obtained through Licor.

GLUL (Abcam, ab228590)

ERK2 (sc-1647, 1:1,000)

IRDye® 800CW Goat anti-Rabbit IgG Secondary Antibody

IRDye® 680RD Goat anti-Mouse IgG Secondary Antibody

# Extended Fig 10e

DUSP6

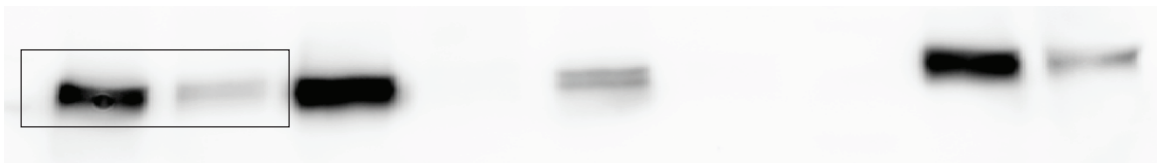

ERK2

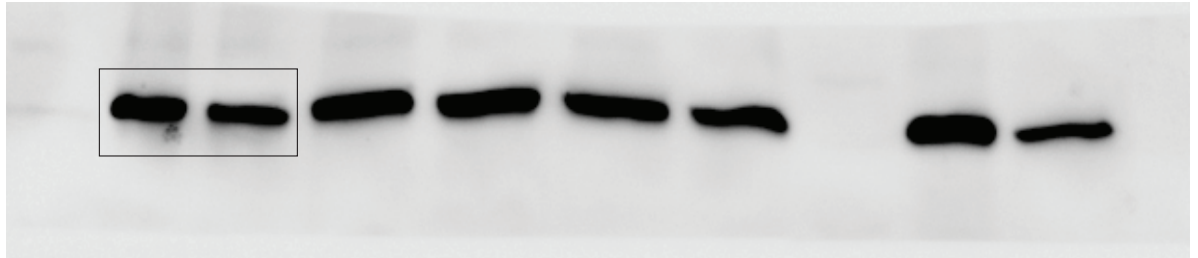

Image obtained through Licor.

DUSP6 (Abcam, A2D4, 1:1,000)

ERK2 (sc-1647, 1:1,000)

IRDye® 800CW Goat anti-Rabbit IgG Secondary Antibody

IRDye® 680RD Goat anti-Mouse IgG Secondary Antibody

Same membrane as in Extended Figure 6f.

Gel was probed for p-ERK and ERK2, then reprobed for  
Anti-O-Linked N-Acetylglucosamine antibody



# Extended Fig 10f

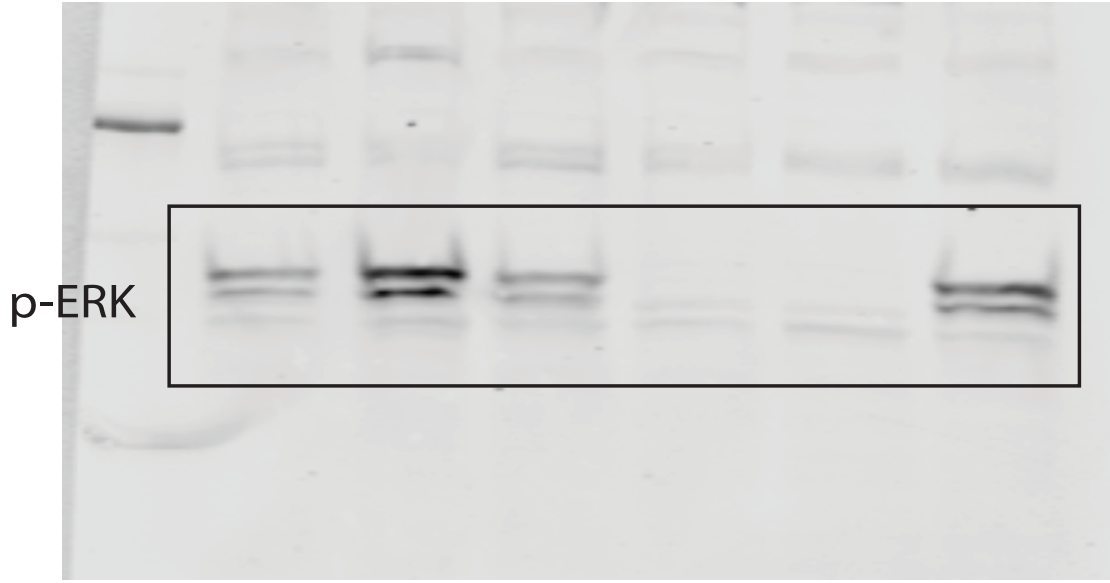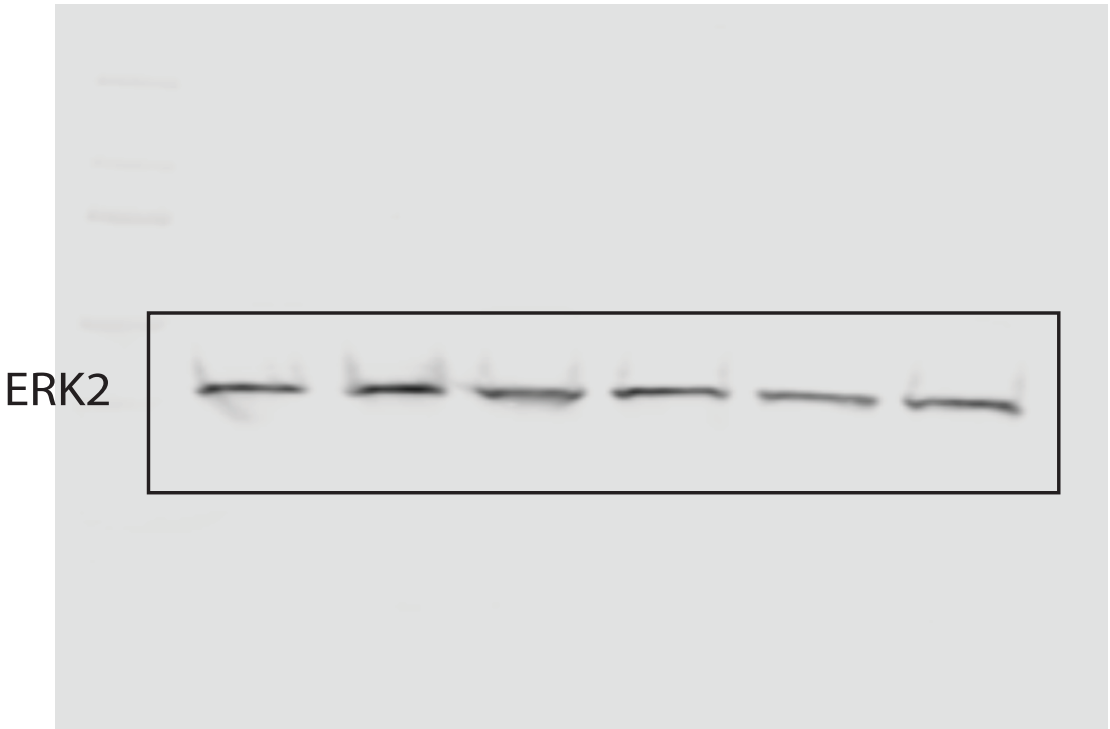

# Extended Fig 10g

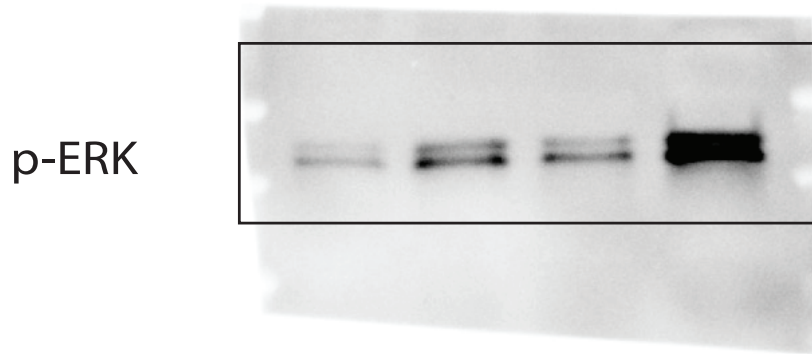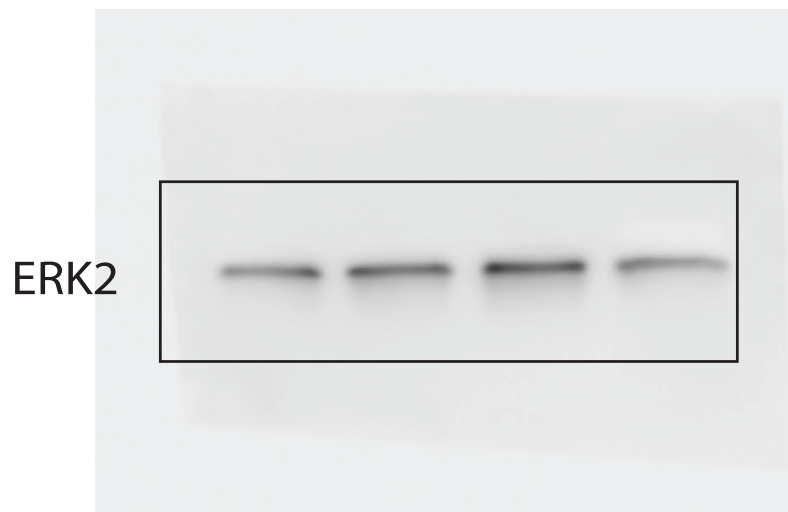

Image obtained through Licor.

p-ERK (CST 4376, 1:1,000)

ERK2 (sc-1647, 1:1,000)

IRDye® 800CW Goat anti-Rabbit IgG Secondary Antibody

IRDye® 680RD Goat anti-Mouse IgG Secondary Antibody

# Extended Fig 10h

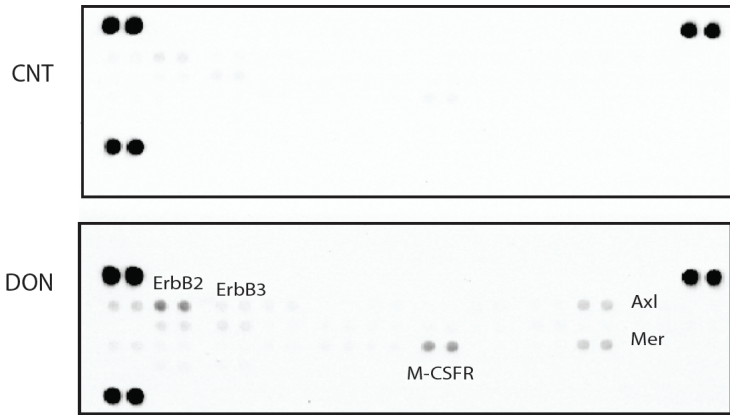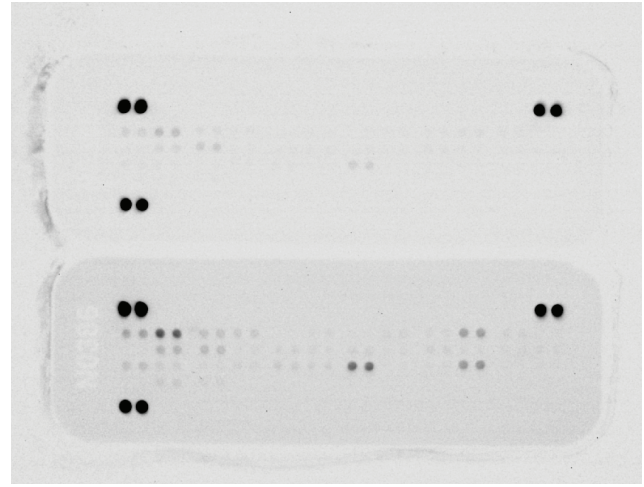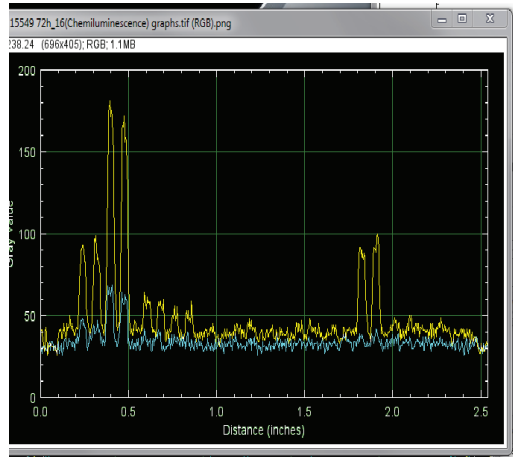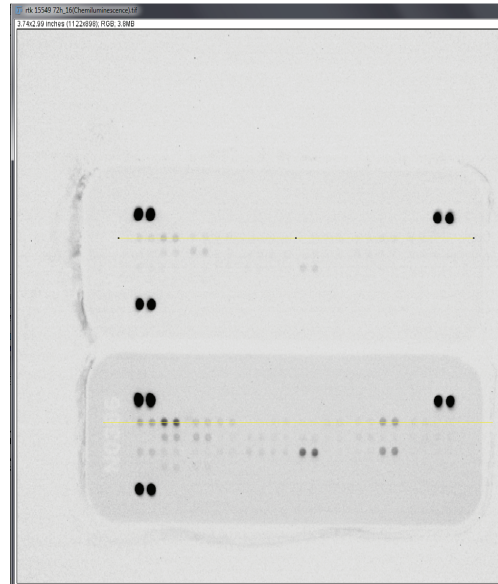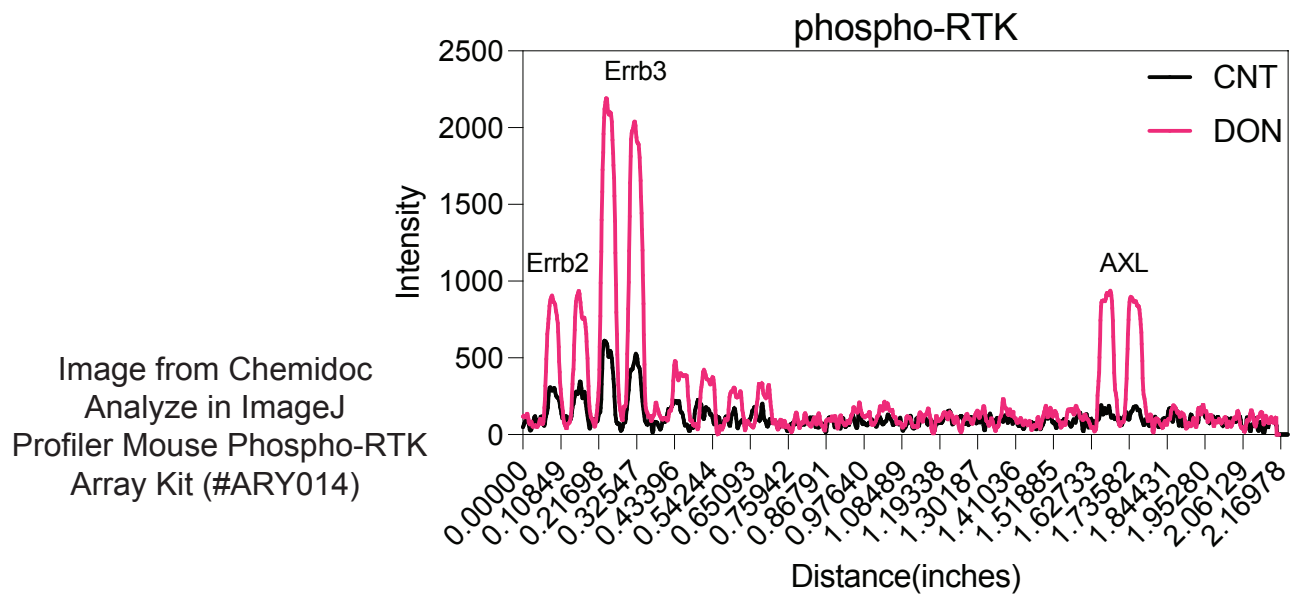

Image from Chemidoc  
Analyze in ImageJ  
Profiler Mouse Phospho-RTK  
Array Kit (#ARY014)

# Extended Fig 10i

PaTu-8988T  
phospho-RTK

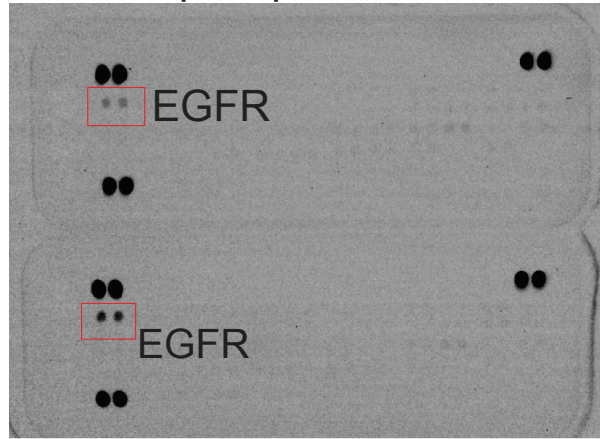

PaTu-8902  
phospho-RTK

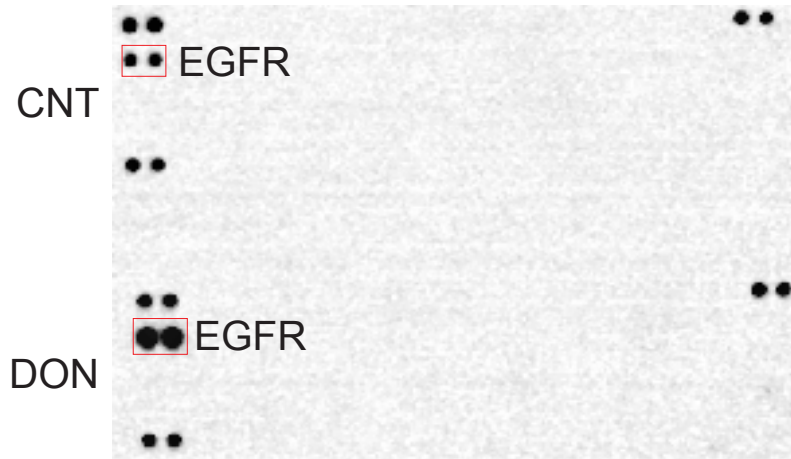

PANC1  
phospho-RTK

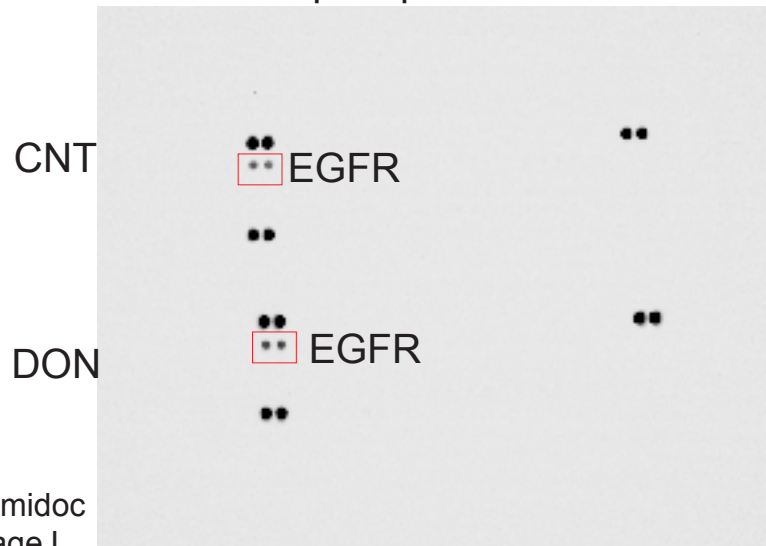

# Extended Fig 10j

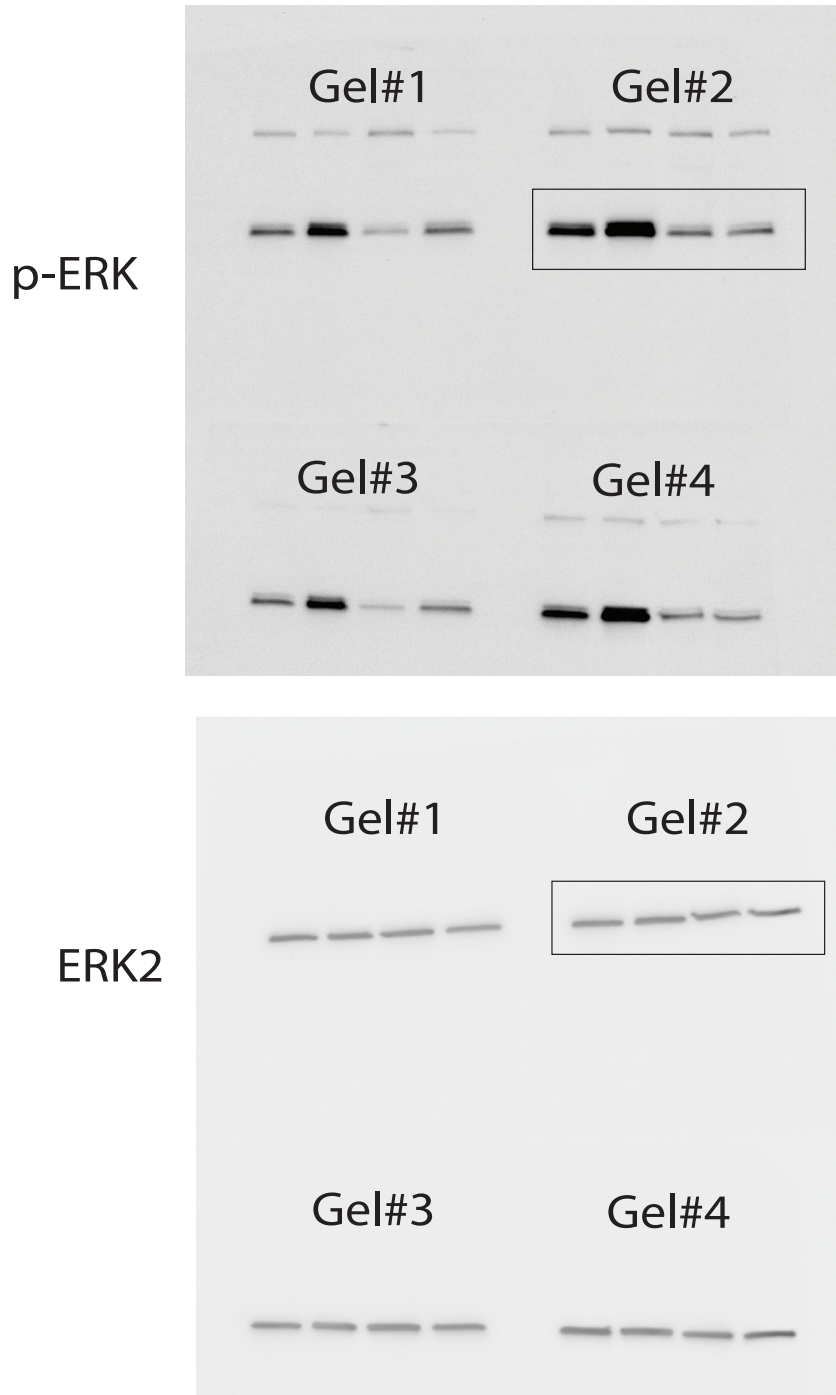

# Extended Fig 10k

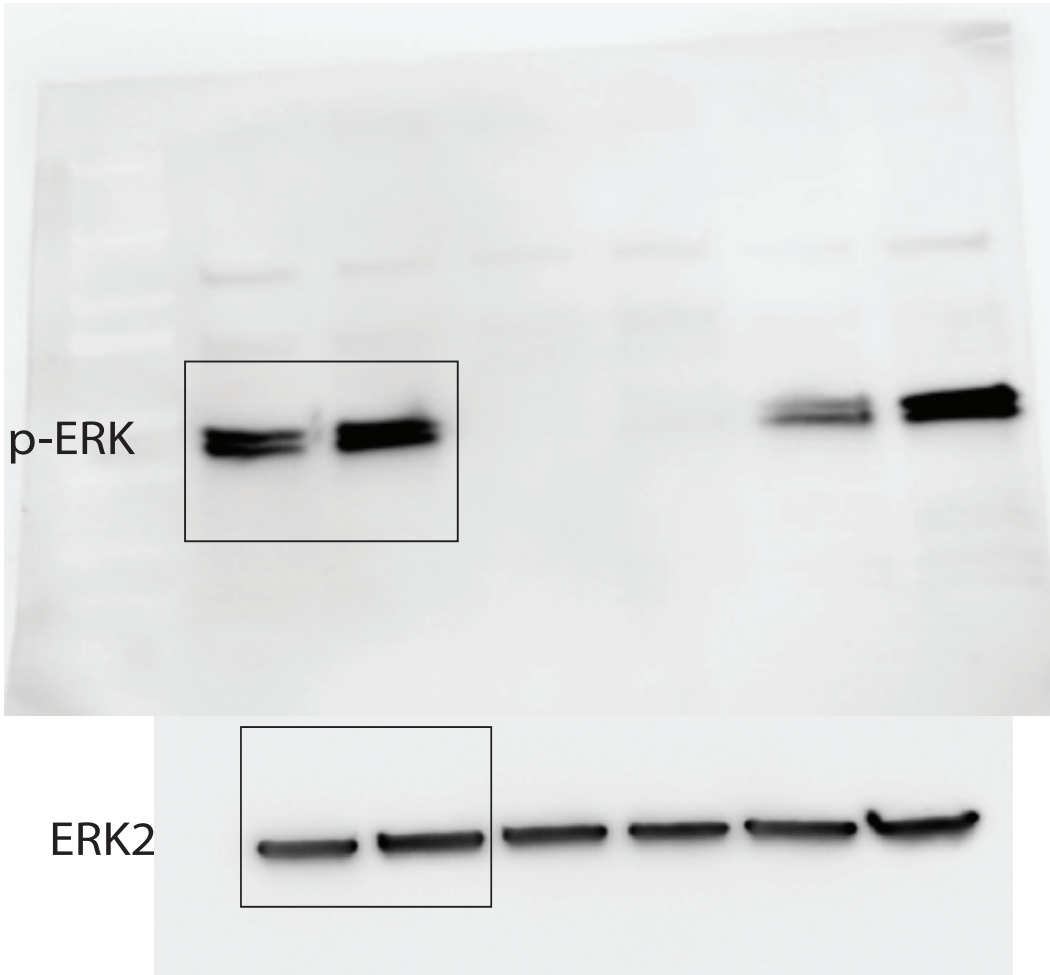

Supplement: 43018_2023_647_MOESM8_ESM.pdf [file 43018_2023_647_MOESM8_ESM.pdf]
