# Supplementary material for: Targeting pancreatic cancer metabolic dependencies through glutamine antagonism
Source: PubMed Central journal article supplement (PMC10824664; doi:10.1038/s43018-023-00647-3), 2023-10-09
Supplement: 43018_2023_647_MOESM1_ESM.pdf [file 43018_2023_647_MOESM1_ESM.pdf]

## Reporting Summary

Nature Portfolio wishes to improve the reproducibility of the work that we publish. This form provides structure for consistency and transparency in reporting. For further information on Nature Portfolio policies, see our [Editorial Policies](#) and the [Editorial Policy Checklist](#).

### Statistics

For all statistical analyses, confirm that the following items are present in the figure legend, table legend, main text, or Methods section.

n/a Confirmed

- The exact sample size ( $n$ ) for each experimental group/condition, given as a discrete number and unit of measurement
- A statement on whether measurements were taken from distinct samples or whether the same sample was measured repeatedly
- The statistical test(s) used AND whether they are one- or two-sided  
*Only common tests should be described solely by name; describe more complex techniques in the Methods section.*
- A description of all covariates tested
- A description of any assumptions or corrections, such as tests of normality and adjustment for multiple comparisons
- A full description of the statistical parameters including central tendency (e.g. means) or other basic estimates (e.g. regression coefficient) AND variation (e.g. standard deviation) or associated estimates of uncertainty (e.g. confidence intervals)
- For null hypothesis testing, the test statistic (e.g.  $F$ ,  $t$ ,  $r$ ) with confidence intervals, effect sizes, degrees of freedom and  $P$  value noted  
*Give  $P$  values as exact values whenever suitable.*
- For Bayesian analysis, information on the choice of priors and Markov chain Monte Carlo settings
- For hierarchical and complex designs, identification of the appropriate level for tests and full reporting of outcomes
- Estimates of effect sizes (e.g. Cohen's  $d$ , Pearson's  $r$ ), indicating how they were calculated

*Our web collection on [statistics for biologists](#) contains articles on many of the points above.*

### Software and code

Policy information about [availability of computer code](#)

**Data collection** ChemiDoc (Biorad); Odyssey CLx (Licor Bioscience); Vectra® Polaris multispectral imaging system; CytationC10 (Agilent), Agilent 5977B mass spectrometer.

**Data analysis** InForm® (Akoya Biosciences, version 2.6); HALO (Indica Labs, v.3.6) ; Graphpad Prism 9.0 (Graph Pad); Python 3.6.5; Matlab R2016 and R 3.5.1. For Gene Set Enrichment Analysis was conducted using GSEA software (version 3.0) with gene sets derived from the KEGG pathway database in the MSigDB collections. Statistical analysis was performed using Graphpad Prism (GraphPad Software, version 9). Gen5 Cytation Software (v3.11).

Metabolize is available at [https://github.com/DrewRJones/Metabolize\\_Public.git](https://github.com/DrewRJones/Metabolize_Public.git) (Accessed on July 10, 2021) under MIT license. GC-MS analysis script is available at [https://github.com/Sethjparker/IntegrateNetCDF\\_WithCorrect](https://github.com/Sethjparker/IntegrateNetCDF_WithCorrect) under MIT license.

For manuscripts utilizing custom algorithms or software that are central to the research but not yet described in published literature, software must be made available to editors and reviewers. We strongly encourage code deposition in a community repository (e.g. GitHub). See the Nature Portfolio [guidelines for submitting code & software](#) for further information.

## Data

Policy information about [availability of data](#)

All manuscripts must include a [data availability statement](#). This statement should provide the following information, where applicable:

- Accession codes, unique identifiers, or web links for publicly available datasets
- A description of any restrictions on data availability
- For clinical datasets or third party data, please ensure that the statement adheres to our [policy](#)

RNA-Seq data that support the findings of this study have been deposited in the Gene Expression Omnibus (GEO) under accession codes GSE236225. The processed metabolomic data (GC-MS and LC-MS) generated in this study are provided in the Source Data file. Source data for Fig. 1-5 and Extended Data Fig. 1-10 have been provided as Source Data files. Further information and requests for reagents may be directed to and will be fulfilled by the corresponding author Alec C. Kimmelman (Alec.Kimmelman@nyulangone.org) on reasonable request.

## Research involving human participants, their data, or biological material

Policy information about studies with [human participants or human data](#). See also policy information about [sex, gender \(identity/presentation\), and sexual orientation](#) and [race, ethnicity and racism](#).

|                                                                    |                                                                                                                                                                                                                                                                                                                                                                                                                                                                                                           |
|--------------------------------------------------------------------|-----------------------------------------------------------------------------------------------------------------------------------------------------------------------------------------------------------------------------------------------------------------------------------------------------------------------------------------------------------------------------------------------------------------------------------------------------------------------------------------------------------|
| Reporting on sex and gender                                        | Sex of patient-derived xenografts<br>NYU341: Female<br>NYU559: Male<br>NYU280: Male<br>NYU338: Male<br>NYU345: Male                                                                                                                                                                                                                                                                                                                                                                                       |
| Reporting on race, ethnicity, or other socially relevant groupings | No report on race, ethnicity, or other socially relevant groupings was used in this study                                                                                                                                                                                                                                                                                                                                                                                                                 |
| Population characteristics                                         | No population characteristics were used in this study.                                                                                                                                                                                                                                                                                                                                                                                                                                                    |
| Recruitment                                                        | No population recruitment was used in this study.                                                                                                                                                                                                                                                                                                                                                                                                                                                         |
| Ethics oversight                                                   | For this study All the work for this study was approved by the Institutional Animal Care and Use Committee (NYULMC-IACUC) protocol #IA16-00507. For PDX-related experiments an Institutional Review Board (S17-00651) was used. For PDX-related experiments, the study was approved by the NYU School of Medicine Institutional Review Board and the Ethics Committee. The pancreas samples were obtained from patients who signed the universal consent form for tissue collection for research studies. |

Note that full information on the approval of the study protocol must also be provided in the manuscript.

## Field-specific reporting

Please select the one below that is the best fit for your research. If you are not sure, read the appropriate sections before making your selection.

Life sciences  Behavioural & social sciences  Ecological, evolutionary & environmental sciences

For a reference copy of the document with all sections, see [nature.com/documents/nr-reporting-summary-flat.pdf](https://nature.com/documents/nr-reporting-summary-flat.pdf)

## Life sciences study design

All studies must disclose on these points even when the disclosure is negative.

|                 |                                                                                                                                                                                                                                                                                                                                                                                                                  |
|-----------------|------------------------------------------------------------------------------------------------------------------------------------------------------------------------------------------------------------------------------------------------------------------------------------------------------------------------------------------------------------------------------------------------------------------|
| Sample size     | As described in Yamamoto, et al. Nature, 2020. No sample size calculation was done either for in vitro or in vivo studies. For in vivo studies, sample sizes were determined based on our preliminary experiments. In our experience, n = 5-10 mice per group is sufficient to detect meaningful biological differences with good reproducibility.                                                               |
| Data exclusions | No data exclusion                                                                                                                                                                                                                                                                                                                                                                                                |
| Replication     | To replicate our biologically meaningful findings, experiments were repeated independently. This is indicated in the associated figure legend for each result. We also utilized orthogonal approaches to validate our findings (e.g., different cell lines, orthotpic versus metastasis model; idifferent mouse backgrounds).                                                                                    |
| Randomization   | Prior to treatment initiation, mice bearing tumours were randomized. Tumour sizes were not measured at the time of randomization.<br><br>Treatment for Seahorse OCR/ECAR, metabolomics, growth curves were not randomized to maintain consistent well assignments between independent experiments; however, cell plating for these assays was randomized. To control for unexpected covariates for Seahorse OCR/ |

ECAR experiments, multiple independent experiments were conducted. Sample acquisition by GC-MS or LC-MS was randomized to control for instrument bias and unexpected covariates.

## Blinding

Blinding was not performed in mouse experiments. The investigator needed to know the treatment groups in order to perform the study. Tumour weights (an objective measurement) were carried out only at the study endpoints after mice were euthanized and tumours were harvested.

In vitro studies were not blinded because experimental and surrogate counting wells needed to be assigned and treated similarly during treatment.

# Reporting for specific materials, systems and methods

We require information from authors about some types of materials, experimental systems and methods used in many studies. Here, indicate whether each material, system or method listed is relevant to your study. If you are not sure if a list item applies to your research, read the appropriate section before selecting a response.

## Materials & experimental systems

## Methods

| n/a                                 | Involved in the study                                           |
|-------------------------------------|-----------------------------------------------------------------|
| <input type="checkbox"/>            | <input checked="" type="checkbox"/> Antibodies                  |
| <input type="checkbox"/>            | <input checked="" type="checkbox"/> Eukaryotic cell lines       |
| <input checked="" type="checkbox"/> | <input type="checkbox"/> Palaeontology and archaeology          |
| <input type="checkbox"/>            | <input checked="" type="checkbox"/> Animals and other organisms |
| <input checked="" type="checkbox"/> | <input type="checkbox"/> Clinical data                          |
| <input checked="" type="checkbox"/> | <input type="checkbox"/> Dual use research of concern           |
| <input checked="" type="checkbox"/> | <input type="checkbox"/> Plants                                 |

| n/a                                 | Involved in the study                              |
|-------------------------------------|----------------------------------------------------|
| <input checked="" type="checkbox"/> | <input type="checkbox"/> ChIP-seq                  |
| <input type="checkbox"/>            | <input checked="" type="checkbox"/> Flow cytometry |
| <input checked="" type="checkbox"/> | <input type="checkbox"/> MRI-based neuroimaging    |

## Antibodies

### Antibodies used

ERK2 (Santa Cruz, sc-1647, 1:1,000); Phospho-p44/42 MAPK (ERK1/2) (CST, 4376, 1:1,000); DUSP6 (Abcam, A2D4, 1:1,000); Anti-O-Linked N-Acetylglucosamine antibody [RL2] (Abcam, ab2739, 1:1000); Cleaved Caspase-3 (CST, 9664, 1:1,000); ATF4 (CST, 11815, 1:1,000); Phospho-eIF2 $\alpha$  (Ser51) (CST, 3398, 1:1,000); Ki67 (Abcam, 16667, 1:500); GLUL (Abcam, 228590, 1:1,000); , Anti-mouse IgG, HRP-linked Antibody (CST, 7076S, 1:5,000), Anti-rabbit IgG, HRP-linked Antibody (CST, 7074S, 1:5,000). For LICOR imaging, IRDye<sup>®</sup> 800CW Goat anti-Rabbit IgG Secondary Antibody (Licor, 926-32211, 1:10,000); IRDye<sup>®</sup> 680RD Goat anti-Mouse IgG Secondary Antibody (Licor, 926-68070, 1:10,000).

For IHC or multiplexing:

CK19 (Millipore, MABT913, 1:100)  
 Mouse PDGF R alpha Antibody (R&D, AF1062, 1:100)  
 Podoplanin Monoclonal Antibody (NZ-1.3), eBioscience™ (1:4,000)  
 Anti-alpha smooth muscle Actin antibody (ab5694): (1:4,000)

Secondary HRP Polymer; Vendor/Cat#:

Goat-on-Rodent HRP Polymer, Biocare GHP516H  
 Rat-HRP-Polymer 1-Step, Biocare BRR4016H  
 Peroxidase-conjugated Anti-Syrian Hamster IgG, Jackson Labs, 307-036-003  
 Rabbit-on-Rodent HRP Polymer, Biocare RMR622L

OPAL Fluor:

520, Akoya FP1487001KT  
 690, Akoya FP1497001KT  
 570, Akoya FP1488001KT  
 620, Akoya FP1495001KT

### Validation

All antibodies used are commercially available and validated by the manufacturers.

Phospho-p44/42 MAPK (ERK1/2): <https://www.cellsignal.com/products/primary-antibodies/phospho-p44-42-mapk-erk1-2-thr202-tyr204-20g11-rabbit-mab/4376>

C-Cleaved Caspase-3 (Asp175) (5A1E) Rabbit mAb #9664: <https://www.cellsignal.com/products/primary-antibodies/cleaved-caspase-3-asp175-5a1e-rabbit-mab/9664>

ATF-4 (D4B8) Rabbit mAb #11815: <https://www.cellsignal.com/products/primary-antibodies/atf-4-d4b8-rabbit-mab/11815>

Phospho-eIF2 $\alpha$  (Ser51) (D9G8) XP<sup>®</sup> Rabbit mAb #3398: <https://www.cellsignal.com/products/primary-antibodies/phospho-eif2a-ser51-d9g8-xp-rabbit-mab/3398>

Anti-mouse IgG, HRP-linked Antibody #7076: [https://www.cellsignal.com/products/secondary-antibodies/anti-mouse-igg-hrp-linked-antibody/7076?site-search-type=Products&N=4294956287&Ntt=7076s&fromPage=plp&\\_requestid=452578](https://www.cellsignal.com/products/secondary-antibodies/anti-mouse-igg-hrp-linked-antibody/7076?site-search-type=Products&N=4294956287&Ntt=7076s&fromPage=plp&_requestid=452578)

Anti-rabbit IgG, HRP-linked Antibody #7074: [https://www.cellsignal.com/products/secondary-antibodies/anti-rabbit-igg-hrp-linked-antibody/7074?site-search-type=Products&N=4294956287&Ntt=7074s&fromPage=plp&\\_requestid=452610](https://www.cellsignal.com/products/secondary-antibodies/anti-rabbit-igg-hrp-linked-antibody/7074?site-search-type=Products&N=4294956287&Ntt=7074s&fromPage=plp&_requestid=452610)

Anti-DUSP6 antibody [A2D4] (ab238512): <https://www.abcam.com/products/primary-antibodies/dusp6-antibody-a2d4-ab238512.html>

Anti-O-Linked N-Acetylglucosamine antibody [RL2] (ab2739): <https://www.abcam.com/products/primary-antibodies/o-linked-n-acetylglucosamine-antibody-rl2-ab2739.html>

Recombinant Anti-Ki67 antibody [SP6] (ab16667): <https://www.abcam.com/products/primary-antibodies/ki67-antibody-sp6-ab16667.html>

Anti-Glutamine Synthetase antibody (ab228590): <https://www.abcam.com/products/primary-antibodies/glutamine-synthetase-antibody-ab228590.html>

IRDye® 800CW Goat anti-Rabbit IgG Secondary Antibody: <https://www.licor.com/bio/reagents/irdye-800cw-goat-anti-rabbit-igg-secondary-antibody>

IRDye® 680RD Goat anti-Mouse IgG Secondary Antibody: <https://www.licor.com/bio/reagents/irdye-680rd-goat-anti-mouse-igg-secondary-antibody>

For IHC or Multiplexing

Anti-Cytokeratin 19, clone TROMA-3, Cat. No. MABT91: [https://www.emdmillipore.com/US/en/product/Anti-Cytokeratin-19-Antibody-clone-TROMA-3,MM\\_NF-MABT913](https://www.emdmillipore.com/US/en/product/Anti-Cytokeratin-19-Antibody-clone-TROMA-3,MM_NF-MABT913)

Mouse PDGF R alpha Antibody, AF1062: [https://www.rndsystems.com/products/mouse-pdgf-r-alpha-antibody\\_af1062](https://www.rndsystems.com/products/mouse-pdgf-r-alpha-antibody_af1062)

Podoplanin Monoclonal Antibody (NZ-1.3), eBioscience™: <https://www.thermofisher.com/antibody/product/Podoplanin-Antibody-clone-NZ-1-3-Monoclonal/14-9381-82>

Anti-alpha smooth muscle Actin antibody (ab5694): <https://www.abcam.com/products/primary-antibodies/alpha-smooth-muscle-actin-antibody-ab5694.html>

Secondary HRP Polymer; Vendor/Cat#:

Goat-on-Rodent HRP Polymer, Biocare GHP516H: <https://biocare.net/product/goat-on-rodent-hrp-polymer/>

Rat-HRP-Polymer 1-Step, Biocare BRR4016H: <https://biocare.net/wp-content/uploads/4016.pdf>

Peroxidase-conjugated Anti-Syrian Hamster IgG, Jackson Labs, 307-036-003: <https://www.jacksonimmuno.com/catalog/products/307-036-003>

Rabbit-on-Rodent HRP Polymer, Biocare RMR622L: <https://biocare.net/wp-content/uploads/RMR622.pdf>

OOPAL Fluor: <https://www.akoyabio.com/>

520, Akoya FP1487001KT

690, Akoya FP1497001KT

570, Akoya FP1488001KT

620, Akoya FP1495001KT

## Eukaryotic cell lines

Policy information about [cell lines and Sex and Gender in Research](#)

Cell line source(s)

PaTu-8988T, PANC1, MiaPaCa2, and PaTu-8902 were obtained from ATCC or the DSMZ. HY15549 and HY19636 were derived from female KPC mice (p48-Cre+;KrasLSL-G12D/+;Trp53lox/+) that were fully backcrossed into a C57BL/6 background All cell lines were grown in 5% CO2 and 37C°. All cell lines were cultured in DMEM (Corning 10-017-CV) with 10% fetal bovine serum (FBS) (Atlanta Biologicals S11550H) and 1% Penicillin/Streptomycin (Thermo, 15140122).

Sex of the primary murine PDAC cell lines used in this study:

HY19636: female

HY15549: female

Sex of patient-derived specimens:

NYU341: Female

NYU559: Male

NYU280: Male

NYU338: Male

NYU345: Male

|                                                                      |                                                                                                                                                                |
|----------------------------------------------------------------------|----------------------------------------------------------------------------------------------------------------------------------------------------------------|
| Authentication                                                       | Cell lines were authenticated by periodic fingerprinting and visual inspection, and low passage cultures were carefully maintained in a central lab cell bank. |
| Mycoplasma contamination                                             | Cells were tested routinely for mycoplasma contamination by PCR. All cell lines and organoids used in this study tested negative for mycoplasma.               |
| Commonly misidentified lines<br>(See <a href="#">ICLAC</a> register) | No commonly misidentified cell lines were used.                                                                                                                |

## Animals and other research organisms

Policy information about [studies involving animals](#); [ARRIVE guidelines](#) recommended for reporting animal research, and [Sex and Gender in Research](#)

|                         |                                                                                                                                                                                                                                                                                                                                                                                                               |
|-------------------------|---------------------------------------------------------------------------------------------------------------------------------------------------------------------------------------------------------------------------------------------------------------------------------------------------------------------------------------------------------------------------------------------------------------|
| Laboratory animals      | All animal studies were approved by the NYULMC IACUC (Institutional Animal Care and Use Committee), Protocols #IA16-00507. Female mice B6J (Taconic, C57BL/6J), athymic (Taconic, NCrNU), or NSG (Jackson Laboratory) used in this study were 8-10 weeks old and not involved in previous procedures. All mice were maintained in the animal facility of the New York University Grossman School of Medicine. |
| Wild animals            | No wild animals were used in the study.                                                                                                                                                                                                                                                                                                                                                                       |
| Reporting on sex        | Sex of patient-derived specimens:<br>NYU341: Female<br>NYU559: Male<br>NYU280: Male<br>NYU338: Male<br>NYU345: Male<br><br>The mouse and human pancreatic cancer cell lines were derived from both male and females. All the mice for this study were female and sex was not a specified variable for analysis .                                                                                              |
| Field-collected samples | No field collected samples were used in the study.                                                                                                                                                                                                                                                                                                                                                            |
| Ethics oversight        | All animal studies were approved by the NYULMC IACUC (Institutional Animal Care and Use Committee), Protocols #IA16-00507.                                                                                                                                                                                                                                                                                    |

Note that full information on the approval of the study protocol must also be provided in the manuscript.

## Flow Cytometry

### Plots

Confirm that:

- The axis labels state the marker and fluorochrome used (e.g. CD4-FITC).
- The axis scales are clearly visible. Include numbers along axes only for bottom left plot of group (a 'group' is an analysis of identical markers).
- All plots are contour plots with outliers or pseudocolor plots.
- A numerical value for number of cells or percentage (with statistics) is provided.

### Methodology

|                           |                                                                                                                                                                                                                                                                                                                                                                                                                                                                                                                                                                              |
|---------------------------|------------------------------------------------------------------------------------------------------------------------------------------------------------------------------------------------------------------------------------------------------------------------------------------------------------------------------------------------------------------------------------------------------------------------------------------------------------------------------------------------------------------------------------------------------------------------------|
| Sample preparation        | HY19636 cells were treated with DON (25µM) for 24 hours. Then, cells were treated with CellROX™ Deep Red Reagent (Fischer, C10422) at a concentration of 5µM, incubated for 30 minutes at 37C as described in the manufacturer protocol. Cells were washed with FCM buffer (HBSS containing 1% FBS, 1 mM EDTA, and 10 mM HEPES). Dead cells were depleted by DAPI staining. Experiment was performance twice and data included in paper show a representative experiment. The data was displayed as Mean Fluorescent Intensity (MFI) of bright deep red fluorescence signal. |
| Instrument                | Cells were analyzed on a BD LSR Fortessa or a BD LSR-II UV and analyzed by FlowJo software (FlowJo, LLC, version 10.4).                                                                                                                                                                                                                                                                                                                                                                                                                                                      |
| Software                  | FACSDiva software (BD Biosciences) was used to collect the data, and the data was analyzed by FlowJo software (FlowJo, LLC, version 10.4).                                                                                                                                                                                                                                                                                                                                                                                                                                   |
| Cell population abundance | The purity of cells was confirmed by viability (DAPI negative) usually > 90%.                                                                                                                                                                                                                                                                                                                                                                                                                                                                                                |
| Gating strategy           | For FACS, singlet cells were identified by forward and side scatter, viability (DAPI negative).                                                                                                                                                                                                                                                                                                                                                                                                                                                                              |
| <input type="checkbox"/>  | Tick this box to confirm that a figure exemplifying the gating strategy is provided in the Supplementary Information.                                                                                                                                                                                                                                                                                                                                                                                                                                                        |
